# Supplementary material for: Hippo signaling and histone methylation control cardiomyocyte cell cycle re-entry through distinct transcriptional pathways
Source: PubMed Central journal article supplement (PMC9925018; doi:10.1371/journal.pone.0281610), 2023-02-13
Supplement: pone.0281610.s010.pdf [file pone.0281610.s010.pdf]

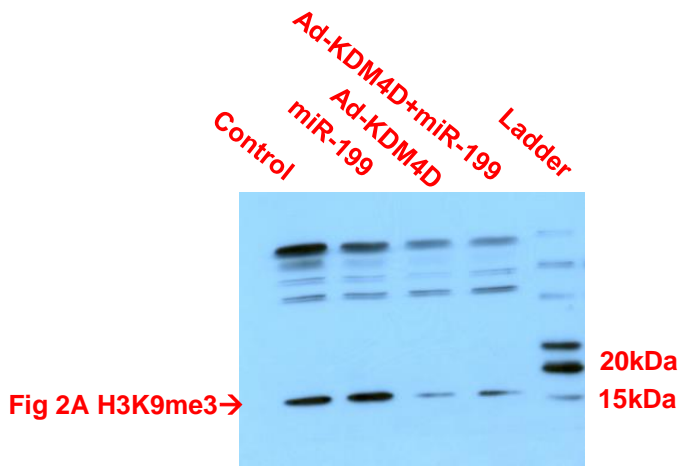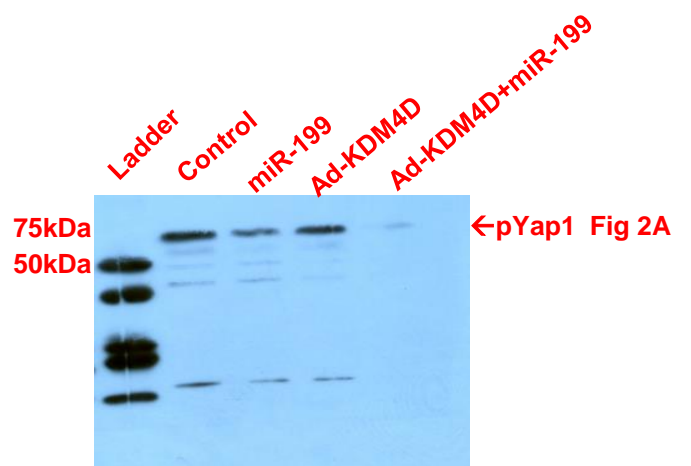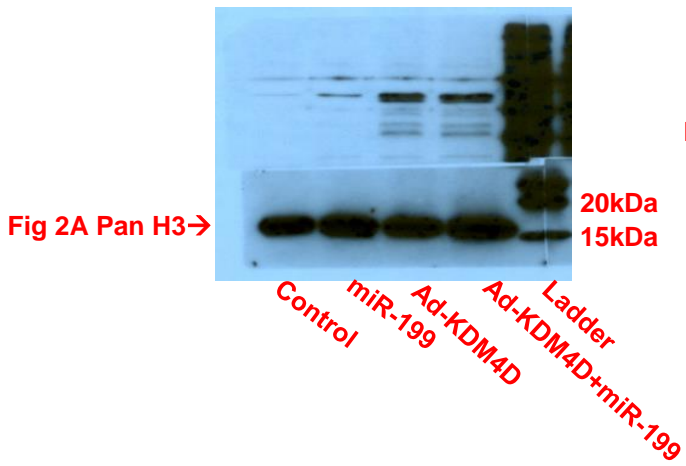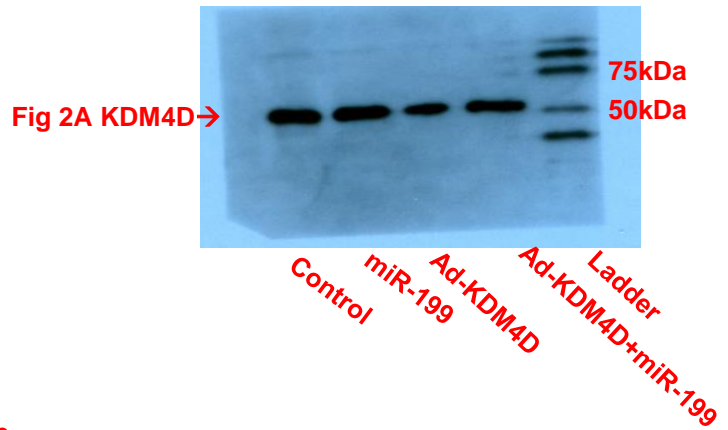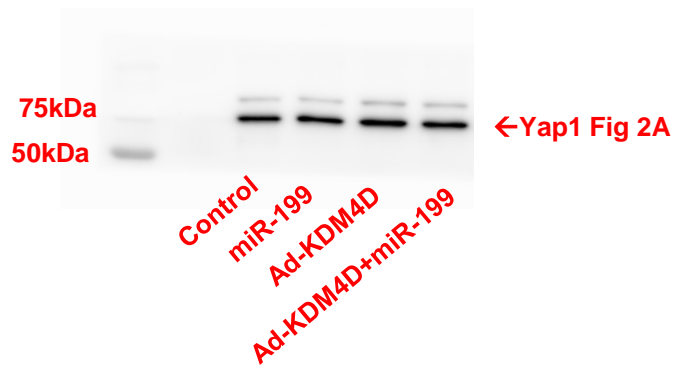

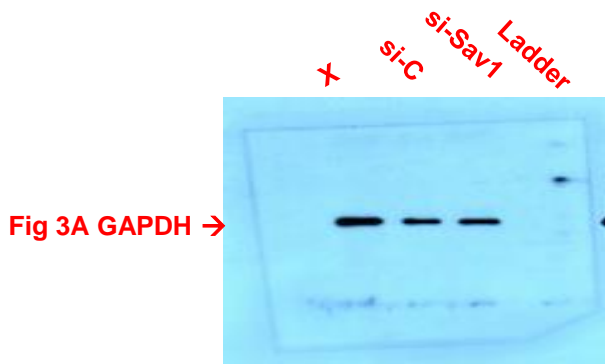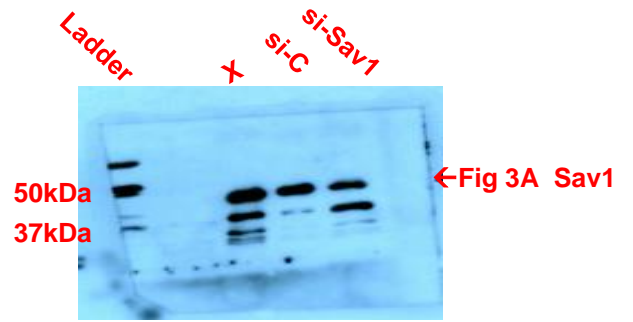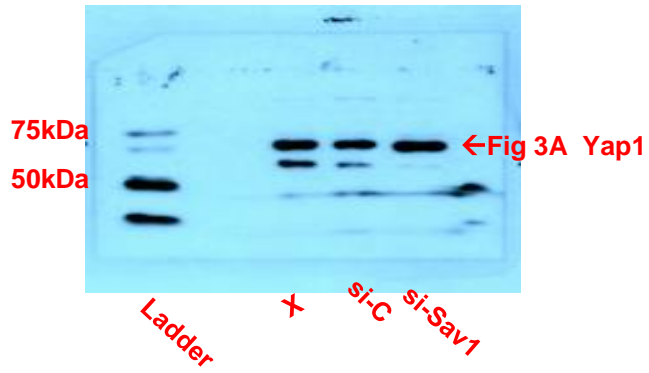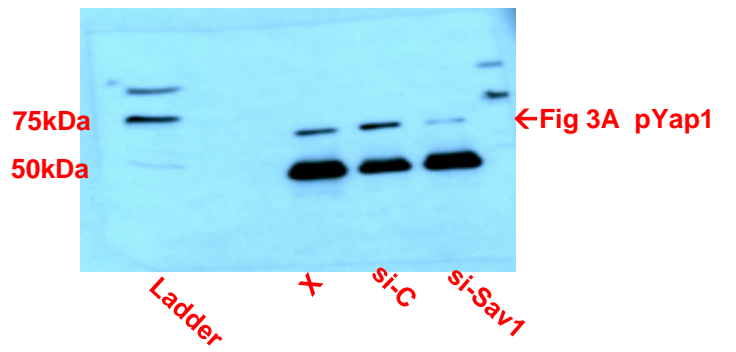

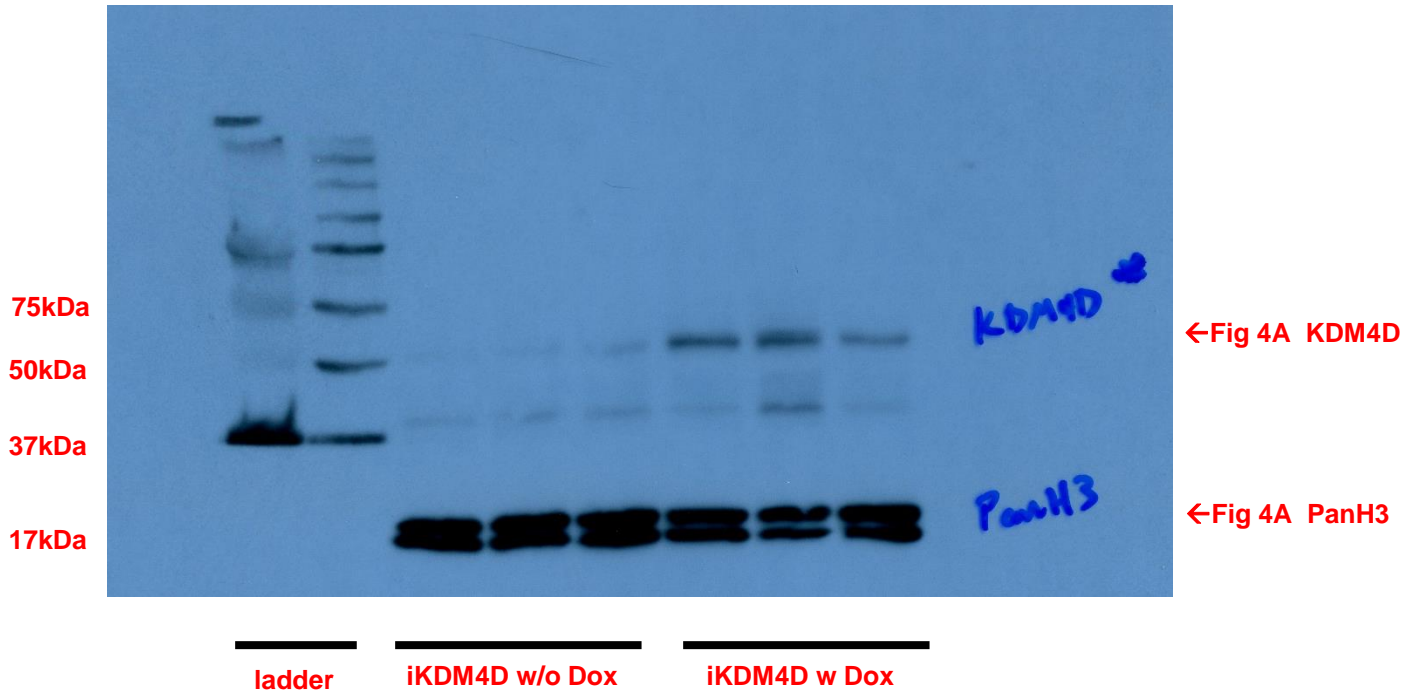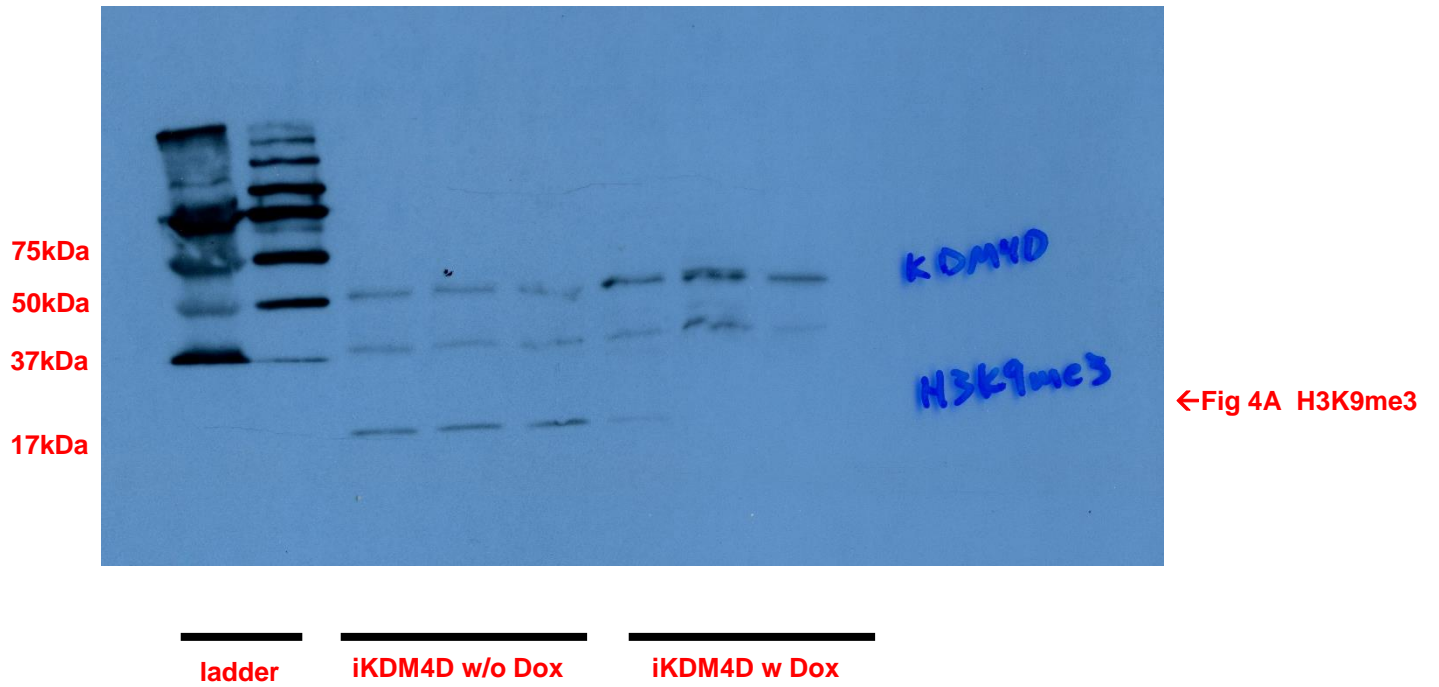

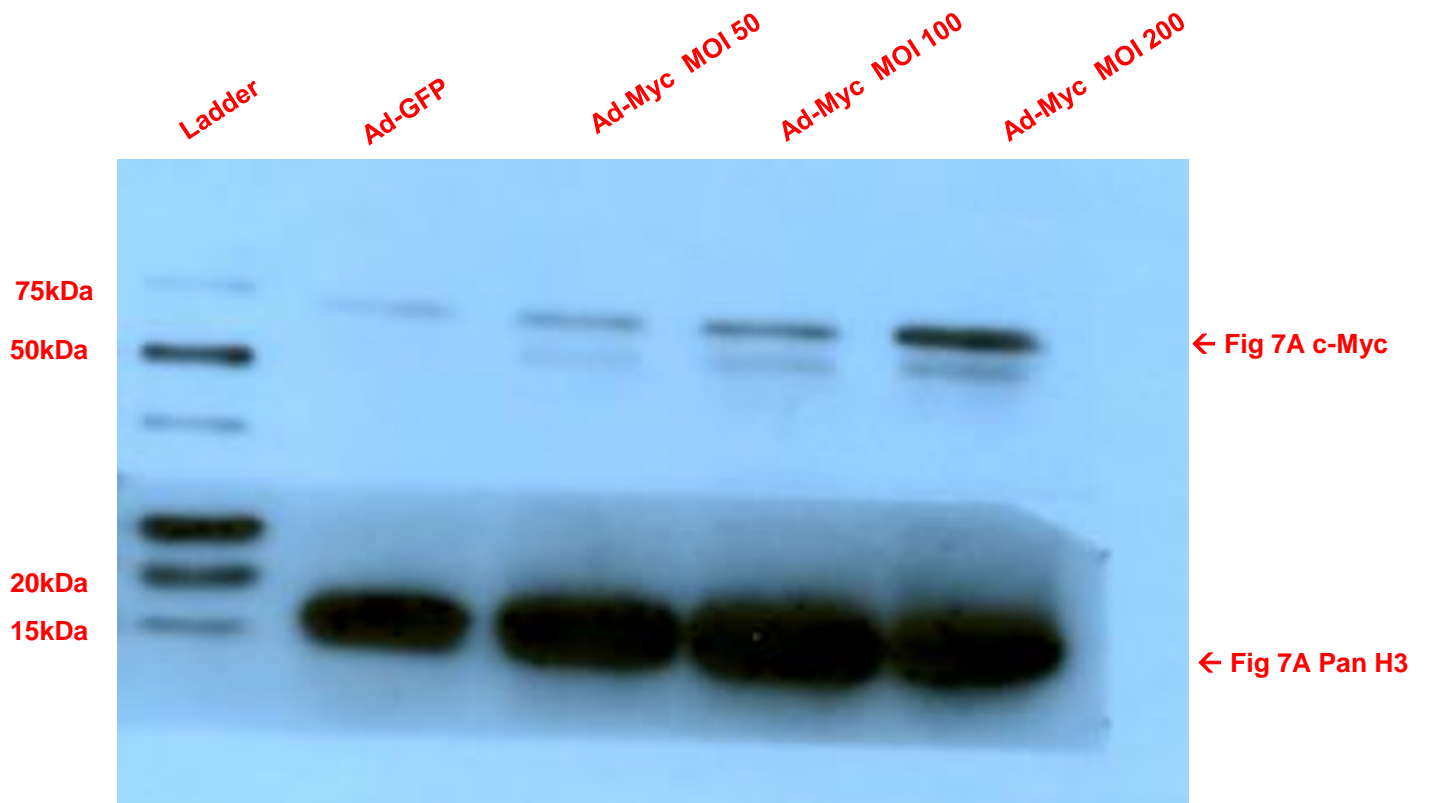

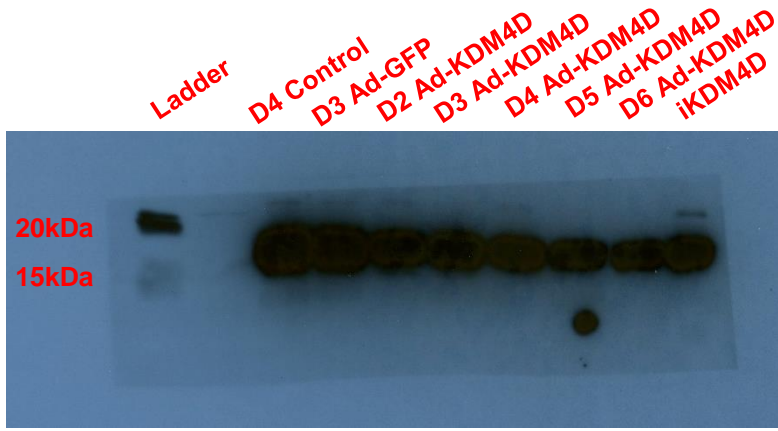

← S3 Fig PanH3

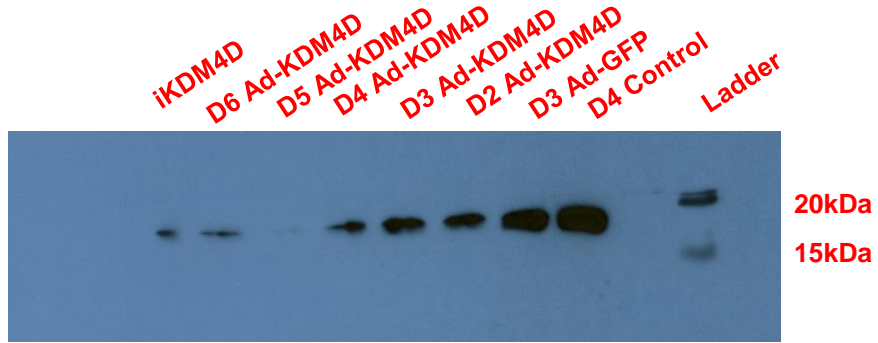

S3 Fig H3K9me3→

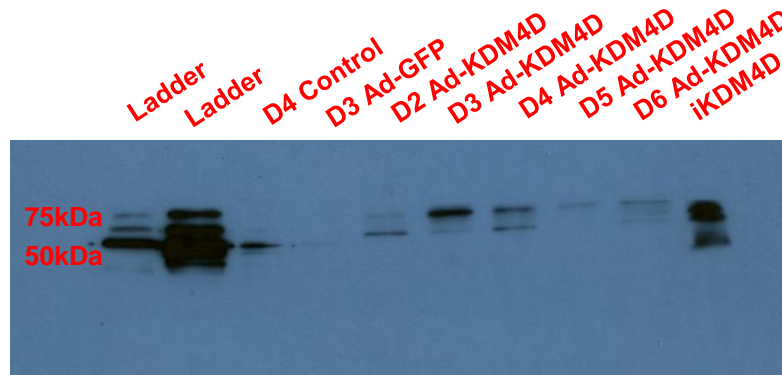

← S3 Fig KDM4D
